# Supplementary material for: Proximity to Traffic, Ambient Air Pollution, and Community Noise in Relation to Incident Rheumatoid Arthritis
Source: PubMed Central journal article supplement (PMC4181921; doi:10.1289/ehp.1307413), 2014-06-06
Supplement: ehp.1307413.s001.508.pdf [file ehp.1307413.s001.508.pdf]

## **Supplemental Material**

### **Proximity to Traffic, Ambient Air Pollution, and Community Noise in Relation to Incident Rheumatoid Arthritis**

Anneclaire J. De Roos, Mieke Koehoorn, Lillian Tamburic, Hugh W. Davies, and

Michael Brauer

| <b>Table of Contents</b>                                                                                                                                                                                                 | <b>Page</b> |
|--------------------------------------------------------------------------------------------------------------------------------------------------------------------------------------------------------------------------|-------------|
| <b>Table S1.</b> Air pollution and noise exposure distributions by residential proximity to traffic in the at-risk cohort during the cohort definition period (1994-1998)                                                | 2           |
| <b>Table S2.</b> Risk of incident RA in relation to NO and NO <sub>2</sub> , assessed using inverse distance weighting (IDW) (odds ratios [OR] and 95% confidence intervals [CI] for interquartile range [IQR] increase) | 3           |
| <b>Table S3.</b> Risk of incident RA in relation to ambient air pollution and community noise (odds ratios [OR] and 95% confidence intervals [CI] for quintiles of exposure)                                             | 4           |

**Table S1.** Air pollution and noise exposure distributions by residential proximity to traffic in the at-risk cohort during the cohort definition period (1994-1998).<sup>a</sup>

| <b>Exposure</b>              | <b>NO-LUR<br/>(<math>\mu\text{g}/\text{m}^3</math>)</b> | <b>NO<sub>2</sub>-LUR<br/>(<math>\mu\text{g}/\text{m}^3</math>)</b> | <b>Black carbon-<br/>LUR (<math>\mu\text{g}/\text{m}^3</math>)</b> | <b>PM<sub>2.5</sub>-LUR<br/>(<math>\mu\text{g}/\text{m}^3</math>)</b> | <b>PM<sub>10</sub>-IDW<br/>(<math>\mu\text{g}/\text{m}^3</math>)</b> | <b>O<sub>3</sub>-IDW<br/>(<math>\mu\text{g}/\text{m}^3</math>)</b> | <b>CO-IDW<br/>(<math>\mu\text{g}/\text{m}^3</math>)</b> | <b>SO<sub>2</sub>-IDW<br/>(<math>\mu\text{g}/\text{m}^3</math>)</b> | <b>Noise<br/>(dB(A))</b> |
|------------------------------|---------------------------------------------------------|---------------------------------------------------------------------|--------------------------------------------------------------------|-----------------------------------------------------------------------|----------------------------------------------------------------------|--------------------------------------------------------------------|---------------------------------------------------------|---------------------------------------------------------------------|--------------------------|
| No. observations             | 640,041                                                 | 640,041                                                             | 616,672                                                            | 620,535                                                               | 499,015                                                              | 586,777                                                            | 501,888                                                 | 590,348                                                             | 445,887                  |
| <b>Highway</b>               |                                                         |                                                                     |                                                                    |                                                                       |                                                                      |                                                                    |                                                         |                                                                     |                          |
| Never lived near highway     | 29.75 ± 10.50                                           | 28.69 ± 4.97                                                        | 1.24 ± 0.60                                                        | 4.65 ± 2.32                                                           | 13.90 ± 0.57                                                         | 27.10 ± 4.91                                                       | 739.4 ± 152.7                                           | 6.39 ± 2.73                                                         | 62.99 ± 4.77             |
| >50m to 150m from highway    | 36.43 ± 14.30                                           | 31.69 ± 5.77                                                        | 1.63 ± 0.64                                                        | 5.46 ± 2.51                                                           | 13.78 ± 0.51                                                         | 26.30 ± 5.39                                                       | 765.2 ± 160.7                                           | 7.26 ± 3.03                                                         | 67.36 ± 5.07             |
| ≤50m from highway            | 44.95 ± 17.74                                           | 33.51 ± 5.91                                                        | 1.60 ± 0.61                                                        | 5.41 ± 2.78                                                           | 13.71 ± 0.50                                                         | 28.26 ± 5.62                                                       | 725.7 ± 171.8                                           | 6.31 ± 3.06                                                         | 71.33 ± 5.17             |
| <b>Major road</b>            |                                                         |                                                                     |                                                                    |                                                                       |                                                                      |                                                                    |                                                         |                                                                     |                          |
| Never lived near major road  | 26.73 ± 7.12                                            | 27.37 ± 4.38                                                        | 1.17 ± 0.56                                                        | 4.39 ± 2.22                                                           | 13.91 ± 0.56                                                         | 27.72 ± 4.78                                                       | 719.9 ± 146.7                                           | 6.10 ± 2.60                                                         | 62.29 ± 4.71             |
| >50m to 150m from major road | 33.64 ± 11.71                                           | 31.78 ± 5.30                                                        | 1.41 ± 0.65                                                        | 5.40 ± 2.46                                                           | 13.82 ± 0.56                                                         | 25.64 ± 5.04                                                       | 782.5 ± 158.5                                           | 7.19 ± 2.94                                                         | 64.00 ± 4.59             |
| ≤50m from major road         | 44.18 ± 15.91                                           | 31.60 ± 5.15                                                        | 1.53 ± 0.65                                                        | 4.98 ± 2.45                                                           | 13.91 ± 0.60                                                         | 27.14 ± 5.08                                                       | 739.9 ± 155.5                                           | 6.51 ± 2.85                                                         | 67.98 ± 5.20             |

Abbreviations: LUR=land-use regression; IDW=inverse-distance weighting

<sup>a</sup>Members of the study population who lived within 150m from a highway/major road during the 5-year exposure period were categorized according to proximity at which they lived the longest.

**Table S2.** Risk of incident RA in relation to NO and NO<sub>2</sub>, assessed using inverse distance weighting (IDW) (odds ratios [OR] and 95% confidence intervals [CI] for interquartile range [IQR] increase).<sup>a</sup>

| Exposure                                  | RA-ICD9:<br>Case N | RA-ICD9:<br>Control N | RA-ICD9:<br>OR (95% CI)<br>[IQR] | RA-<br>prescription:<br>Case N | RA-<br>prescription:<br>Control N | RA-prescription:<br>OR (95% CI)<br>[IQR] | RA-<br>specialist:<br>Case N | RA-<br>specialist:<br>Control N | RA-specialist:<br>OR (95% CI)<br>[IQR] |
|-------------------------------------------|--------------------|-----------------------|----------------------------------|--------------------------------|-----------------------------------|------------------------------------------|------------------------------|---------------------------------|----------------------------------------|
| NO-IDW (µg/m <sup>3</sup> )               | 2554               | 25677                 | 0.82 (0.78, 0.87)<br>[13.9]      | 1992                           | 20659                             | 0.81 (0.76, 0.87)<br>[13.7]              | 1535                         | 14816                           | 0.81 (0.75, 0.87)<br>[13.9]            |
| NO <sub>2</sub> -IDW (µg/m <sup>3</sup> ) | 2560               | 25739                 | 0.83 (0.78, 0.87)<br>[9.1]       | 1994                           | 20692                             | 0.81 (0.76, 0.86)<br>[8.9]               | 1536                         | 14840                           | 0.82 (0.76, 0.88)<br>[9.1]             |

Abbreviations: RA-ICD9=case definition based on 3 ICD9 codes; RA-prescription=case definition based on 2 ICD9 codes plus prescription; RA-specialist=case definition based on 2 ICD9 codes plus visit to specialist; IQR=interquartile range; IDW=inverse-distance weighting

<sup>a</sup>Odds ratios are adjusted for age, sex, and neighborhood socioeconomic status

**Table S3.** Risk of incident RA in relation to ambient air pollution and community noise (odds ratios [OR] and 95% confidence intervals [CI] for quintiles of exposure).<sup>a</sup>

| Exposure                  | RA-ICD9:<br>Case N | RA-ICD9:<br>Control N | RA-ICD9:<br>OR (95% CI) | RA-<br>prescription:<br>Case N | RA-<br>prescription:<br>Control N | RA-<br>prescription:<br>OR (95% CI) | RA-<br>specialist:<br>Case N | RA-<br>specialist:<br>Control N | RA-specialist:<br>OR (95% CI) |
|---------------------------|--------------------|-----------------------|-------------------------|--------------------------------|-----------------------------------|-------------------------------------|------------------------------|---------------------------------|-------------------------------|
| <b>NO-LUR</b>             | 3280               | 33234                 |                         | 2659                           | 26846                             |                                     | 1883                         | 19059                           |                               |
| 1 <sup>st</sup> quintile  |                    |                       | <i>Referent</i>         |                                |                                   | <i>Referent</i>                     |                              |                                 | <i>Referent</i>               |
| 2 <sup>nd</sup> quintile  |                    |                       | 0.97 (0.86, 1.08)       |                                |                                   | 1.05 (0.93, 1.19)                   |                              |                                 | 0.95 (0.82, 1.10)             |
| 3 <sup>rd</sup> quintile  |                    |                       | 0.94 (0.84, 1.06)       |                                |                                   | 0.98 (0.86, 1.11)                   |                              |                                 | 0.94 (0.81, 1.09)             |
| 4 <sup>th</sup> quintile  |                    |                       | 0.92 (0.82, 1.03)       |                                |                                   | 0.90 (0.79, 1.03)                   |                              |                                 | 0.82 (0.71, 0.96)             |
| 5 <sup>th</sup> quintile  |                    |                       | 0.96 (0.85, 1.08)       |                                |                                   | 0.92 (0.80, 1.05)                   |                              |                                 | 0.86 (0.74, 1.00)             |
| <b>NO-IDW</b>             | 2554               | 25677                 |                         | 1992                           | 20659                             |                                     | 1535                         | 14816                           |                               |
| 1 <sup>st</sup> quintile  |                    |                       | <i>Referent</i>         |                                |                                   | <i>Referent</i>                     |                              |                                 | <i>Referent</i>               |
| 2 <sup>nd</sup> quintile  |                    |                       | 0.87 (0.77, 0.99)       |                                |                                   | 0.88 (0.76, 1.01)                   |                              |                                 | 0.90 (0.76, 1.06)             |
| 3 <sup>rd</sup> quintile  |                    |                       | 0.86 (0.76, 0.98)       |                                |                                   | 0.87 (0.76, 1.01)                   |                              |                                 | 0.99 (0.84, 1.16)             |
| 4 <sup>th</sup> quintile  |                    |                       | 0.78 (0.69, 0.89)       |                                |                                   | 0.83 (0.72, 0.96)                   |                              |                                 | 0.80 (0.67, 0.94)             |
| 5 <sup>th</sup> quintile  |                    |                       | 0.67 (0.58, 0.76)       |                                |                                   | 0.64 (0.55, 0.75)                   |                              |                                 | 0.65 (0.54, 0.77)             |
| <b>NO<sub>2</sub>-LUR</b> | 3278               | 33229                 |                         | 2657                           | 26842                             |                                     | 1881                         | 19059                           |                               |
| 1 <sup>st</sup> quintile  |                    |                       | <i>Referent</i>         |                                |                                   | <i>Referent</i>                     |                              |                                 | <i>Referent</i>               |
| 2 <sup>nd</sup> quintile  |                    |                       | 0.92 (0.82, 1.03)       |                                |                                   | 0.93 (0.82, 1.05)                   |                              |                                 | 0.85 (0.73, 0.98)             |
| 3 <sup>rd</sup> quintile  |                    |                       | 0.84 (0.75, 0.95)       |                                |                                   | 0.94 (0.83, 1.06)                   |                              |                                 | 0.87 (0.75, 1.00)             |
| 4 <sup>th</sup> quintile  |                    |                       | 0.90 (0.80, 1.01)       |                                |                                   | 0.82 (0.72, 0.93)                   |                              |                                 | 0.82 (0.71, 0.95)             |
| 5 <sup>th</sup> quintile  |                    |                       | 0.97 (0.86, 1.08)       |                                |                                   | 0.76 (0.67, 0.87)                   |                              |                                 | 0.77 (0.66, 0.90)             |
| <b>NO<sub>2</sub>-IDW</b> | 2560               | 25739                 |                         | 1994                           | 20692                             |                                     | 1536                         | 14840                           |                               |
| 1 <sup>st</sup> quintile  |                    |                       | <i>Referent</i>         |                                |                                   | <i>Referent</i>                     |                              |                                 | <i>Referent</i>               |
| 2 <sup>nd</sup> quintile  |                    |                       | 0.87 (0.77, 0.98)       |                                |                                   | 0.96 (0.83, 1.10)                   |                              |                                 | 1.03 (0.87, 1.20)             |
| 3 <sup>rd</sup> quintile  |                    |                       | 0.80 (0.70, 0.90)       |                                |                                   | 0.90 (0.78, 1.04)                   |                              |                                 | 0.97 (0.82, 1.14)             |
| 4 <sup>th</sup> quintile  |                    |                       | 0.76 (0.67, 0.86)       |                                |                                   | 0.74 (0.63, 0.85)                   |                              |                                 | 0.76 (0.64, 0.90)             |
| 5 <sup>th</sup> quintile  |                    |                       | 0.64 (0.56, 0.73)       |                                |                                   | 0.60 (0.51, 0.70)                   |                              |                                 | 0.63 (0.53, 0.76)             |

| Exposure                    | RA-ICD9:<br>Case N | RA-ICD9:<br>Control N | RA-ICD9:<br>OR (95% CI) | RA-<br>prescription:<br>Case N | RA-<br>prescription:<br>Control N | RA-<br>prescription:<br>OR (95% CI) | RA-<br>specialist:<br>Case N | RA-<br>specialist:<br>Control N | RA-specialist:<br>OR (95% CI) |
|-----------------------------|--------------------|-----------------------|-------------------------|--------------------------------|-----------------------------------|-------------------------------------|------------------------------|---------------------------------|-------------------------------|
| <b>Black carbon-LUR</b>     | 3138               | 32159                 |                         | 2553                           | 25935                             |                                     | 1818                         | 18420                           |                               |
| 1 <sup>st</sup> quintile    |                    |                       | <i>Referent</i>         |                                |                                   | <i>Referent</i>                     |                              |                                 | <i>Referent</i>               |
| 2 <sup>nd</sup> quintile    |                    |                       | 1.13 (1.01, 1.27)       |                                |                                   | 1.13 (0.99, 1.28)                   |                              |                                 | 1.08 (0.93, 1.25)             |
| 3 <sup>rd</sup> quintile    |                    |                       | 1.00 (0.88, 1.12)       |                                |                                   | 1.02 (0.90, 1.16)                   |                              |                                 | 0.99 (0.85, 1.16)             |
| 4 <sup>th</sup> quintile    |                    |                       | 1.02 (0.91, 1.15)       |                                |                                   | 0.93 (0.81, 1.06)                   |                              |                                 | 0.91 (0.78, 1.06)             |
| 5 <sup>th</sup> quintile    |                    |                       | 0.94 (0.83, 1.06)       |                                |                                   | 0.91 (0.80, 1.05)                   |                              |                                 | 0.86 (0.73, 1.01)             |
| <b>PM<sub>2.5</sub>-LUR</b> | 3175               | 32304                 |                         | 2567                           | 26144                             |                                     | 1819                         | 18518                           |                               |
| 1 <sup>st</sup> quintile    |                    |                       | <i>Referent</i>         |                                |                                   | <i>Referent</i>                     |                              |                                 | <i>Referent</i>               |
| 2 <sup>nd</sup> quintile    |                    |                       | 0.98 (0.87, 1.10)       |                                |                                   | 0.95 (0.83, 1.07)                   |                              |                                 | 0.90 (0.78, 1.05)             |
| 3 <sup>rd</sup> quintile    |                    |                       | 0.90 (0.80, 1.01)       |                                |                                   | 0.88 (0.77, 1.00)                   |                              |                                 | 0.86 (0.74, 1.00)             |
| 4 <sup>th</sup> quintile    |                    |                       | 0.93 (0.83, 1.05)       |                                |                                   | 0.91 (0.80, 1.04)                   |                              |                                 | 0.86 (0.74, 1.00)             |
| 5 <sup>th</sup> quintile    |                    |                       | 0.91 (0.80, 1.02)       |                                |                                   | 0.83 (0.72, 0.95)                   |                              |                                 | 0.80 (0.68, 0.94)             |
| <b>PM<sub>10</sub>-IDW</b>  | 2712               | 27208                 |                         | 2135                           | 21850                             |                                     | 1653                         | 15709                           |                               |
| 1 <sup>st</sup> quintile    |                    |                       | <i>Referent</i>         |                                |                                   | <i>Referent</i>                     |                              |                                 | <i>Referent</i>               |
| 2 <sup>nd</sup> quintile    |                    |                       | 0.84 (0.74, 0.94)       |                                |                                   | 0.87 (0.75, 0.99)                   |                              |                                 | 0.92 (0.79, 1.08)             |
| 3 <sup>rd</sup> quintile    |                    |                       | 0.80 (0.71, 0.91)       |                                |                                   | 0.78 (0.67, 0.90)                   |                              |                                 | 0.83 (0.71, 0.98)             |
| 4 <sup>th</sup> quintile    |                    |                       | 0.75 (0.66, 0.85)       |                                |                                   | 0.73 (0.63, 0.84)                   |                              |                                 | 0.77 (0.65, 0.91)             |
| 5 <sup>th</sup> quintile    |                    |                       | 0.66 (0.57, 0.76)       |                                |                                   | 0.69 (0.59, 0.81)                   |                              |                                 | 0.74 (0.62, 0.89)             |
| <b>O<sub>3</sub>-IDW</b>    | 3055               | 30698                 |                         | 2454                           | 24791                             |                                     | 1724                         | 17636                           |                               |
| 1 <sup>st</sup> quintile    |                    |                       | <i>Referent</i>         |                                |                                   | <i>Referent</i>                     |                              |                                 | <i>Referent</i>               |
| 2 <sup>nd</sup> quintile    |                    |                       | 1.15 (1.02, 1.30)       |                                |                                   | 1.33 (1.16, 1.53)                   |                              |                                 | 1.37 (1.16, 1.62)             |
| 3 <sup>rd</sup> quintile    |                    |                       | 1.10 (0.97, 1.24)       |                                |                                   | 1.31 (1.14, 1.51)                   |                              |                                 | 1.39 (1.18, 1.64)             |
| 4 <sup>th</sup> quintile    |                    |                       | 1.29 (1.14, 1.45)       |                                |                                   | 1.54 (1.34, 1.77)                   |                              |                                 | 1.55 (1.32, 1.83)             |
| 5 <sup>th</sup> quintile    |                    |                       | 1.29 (1.14, 1.45)       |                                |                                   | 1.56 (1.35, 1.79)                   |                              |                                 | 1.08 (0.91, 1.28)             |
| <b>CO-IDW</b>               | 2826               | 28269                 |                         | 2249                           | 22807                             |                                     | 1633                         | 16274                           |                               |
| 1 <sup>st</sup> quintile    |                    |                       | <i>Referent</i>         |                                |                                   | <i>Referent</i>                     |                              |                                 | <i>Referent</i>               |
| 2 <sup>nd</sup> quintile    |                    |                       | 0.95 (0.84, 1.07)       |                                |                                   | 1.00 (0.88, 1.14)                   |                              |                                 | 0.93 (0.79, 1.09)             |
| 3 <sup>rd</sup> quintile    |                    |                       | 0.81 (0.71, 0.91)       |                                |                                   | 0.86 (0.75, 0.99)                   |                              |                                 | 0.90 (0.77, 1.05)             |
| 4 <sup>th</sup> quintile    |                    |                       | 0.82 (0.73, 0.93)       |                                |                                   | 0.80 (0.69, 0.92)                   |                              |                                 | 0.86 (0.73, 1.02)             |
| 5 <sup>th</sup> quintile    |                    |                       | 0.75 (0.66, 0.85)       |                                |                                   | 0.68 (0.59, 0.78)                   |                              |                                 | 0.70 (0.59, 0.82)             |

| Exposure                  | RA-ICD9:<br>Case N | RA-ICD9:<br>Control N | RA-ICD9:<br>OR (95% CI) | RA-<br>prescription:<br>Case N | RA-<br>prescription:<br>Control N | RA-<br>prescription:<br>OR (95% CI) | RA-<br>specialist:<br>Case N | RA-<br>specialist:<br>Control N | RA-specialist:<br>OR (95% CI) |
|---------------------------|--------------------|-----------------------|-------------------------|--------------------------------|-----------------------------------|-------------------------------------|------------------------------|---------------------------------|-------------------------------|
| <b>SO<sub>2</sub>-IDW</b> | 3082               | 30963                 |                         | 2477                           | 25011                             |                                     | 1733                         | 17761                           |                               |
| 1 <sup>st</sup> quintile  |                    |                       | <i>Referent</i>         |                                |                                   | <i>Referent</i>                     |                              |                                 | <i>Referent</i>               |
| 2 <sup>nd</sup> quintile  |                    |                       | 1.11 (0.98, 1.25)       |                                |                                   | 1.16 (1.02, 1.33)                   |                              |                                 | 0.98 (0.83, 1.15)             |
| 3 <sup>rd</sup> quintile  |                    |                       | 1.11 (0.98, 1.24)       |                                |                                   | 1.10 (0.97, 1.26)                   |                              |                                 | 1.24 (1.06, 1.44)             |
| 4 <sup>th</sup> quintile  |                    |                       | 0.93 (0.83, 1.05)       |                                |                                   | 0.91 (0.79, 1.04)                   |                              |                                 | 0.93 (0.79, 1.09)             |
| 5 <sup>th</sup> quintile  |                    |                       | 0.85 (0.75, 0.96)       |                                |                                   | 0.74 (0.64, 0.85)                   |                              |                                 | 0.82 (0.70, 0.97)             |
| <b>Noise</b>              | 2188               | 22734                 |                         | 1711                           | 18346                             |                                     | 1315                         | 13173                           |                               |
| 1 <sup>st</sup> quintile  |                    |                       | <i>Referent</i>         |                                |                                   | <i>Referent</i>                     |                              |                                 | <i>Referent</i>               |
| 2 <sup>nd</sup> quintile  |                    |                       | 0.99 (0.86, 1.14)       |                                |                                   | 0.85 (0.72, 1.00)                   |                              |                                 | 0.91 (0.76, 1.09)             |
| 3 <sup>rd</sup> quintile  |                    |                       | 0.91 (0.79, 1.05)       |                                |                                   | 0.94 (0.80, 1.10)                   |                              |                                 | 0.78 (0.65, 0.93)             |
| 4 <sup>th</sup> quintile  |                    |                       | 1.02 (0.88, 1.17)       |                                |                                   | 0.94 (0.81, 1.11)                   |                              |                                 | 0.95 (0.79, 1.13)             |
| 5 <sup>th</sup> quintile  |                    |                       | 1.06 (0.92, 1.22)       |                                |                                   | 0.94 (0.80, 1.10)                   |                              |                                 | 0.88 (0.74, 1.06)             |

Abbreviations: RA-ICD9=case definition based on 3 ICD9 codes; RA-prescription=case definition based on 2 ICD9 codes plus prescription; RA-specialist=case definition based on 2 ICD9 codes plus visit to specialist; LUR=land-use regression; IDW=inverse-distance weighting

<sup>a</sup>Odds ratios are adjusted for age, sex, and neighborhood socioeconomic status.
